# Supplementary material
Source: MDPI journal article supplement (https://www.mdpi.com/2227-9040/11/6/337)
Supplement: s1 [file s1]

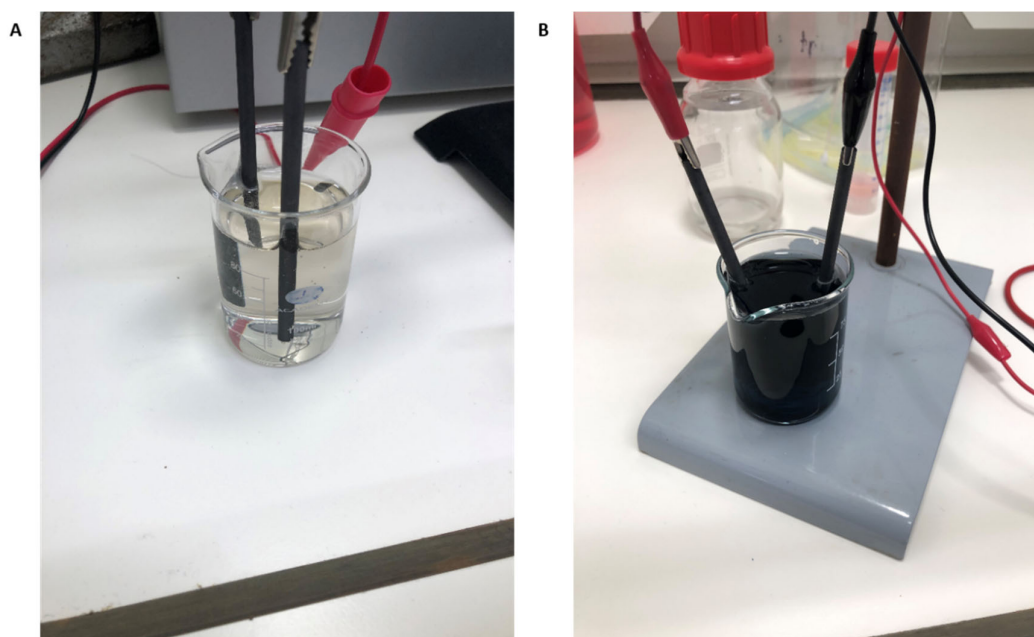

**Figure S1.** Photograph of (A) Graphite rods in PSS electrolyte at the beginning of the electrochemical exfoliation (B) After the electrochemical exfoliation process.

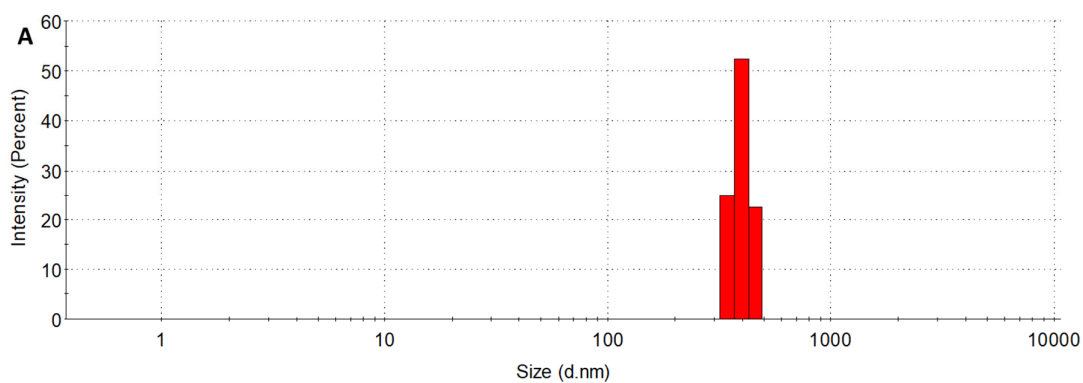

**Figure S2.** Particle size analysis results of synthesised electrochemically exfoliated graphene (EEFGH).

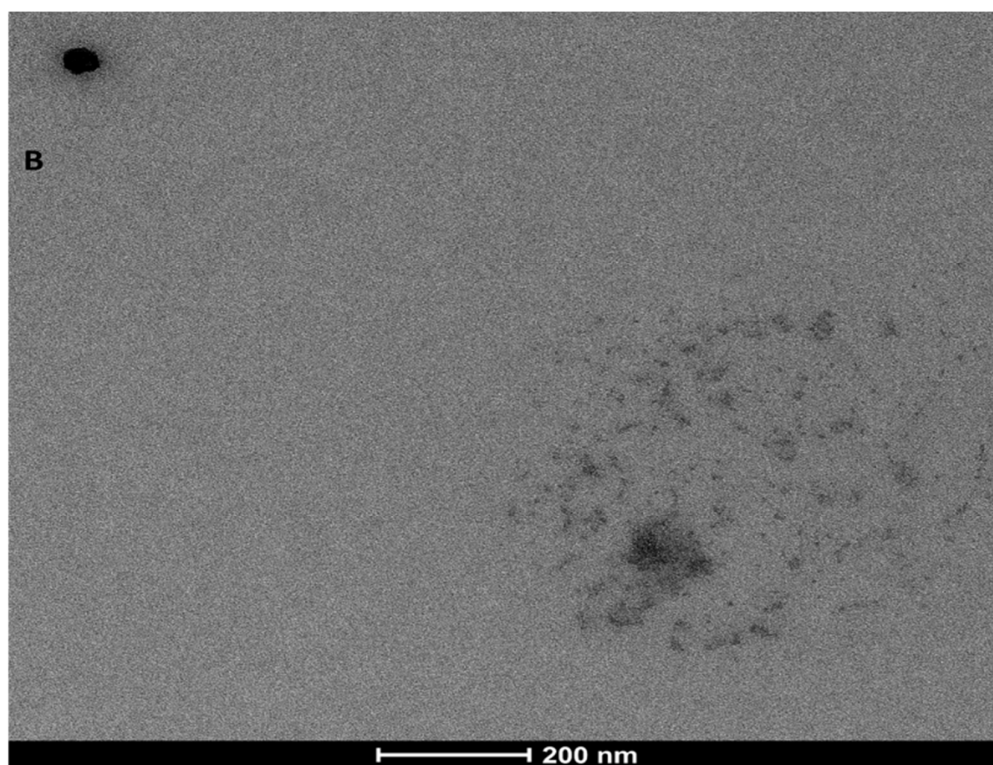

**Figure S3.** TEM image of electrochemically exfoliated graphene. Scale bar: 200 nm.

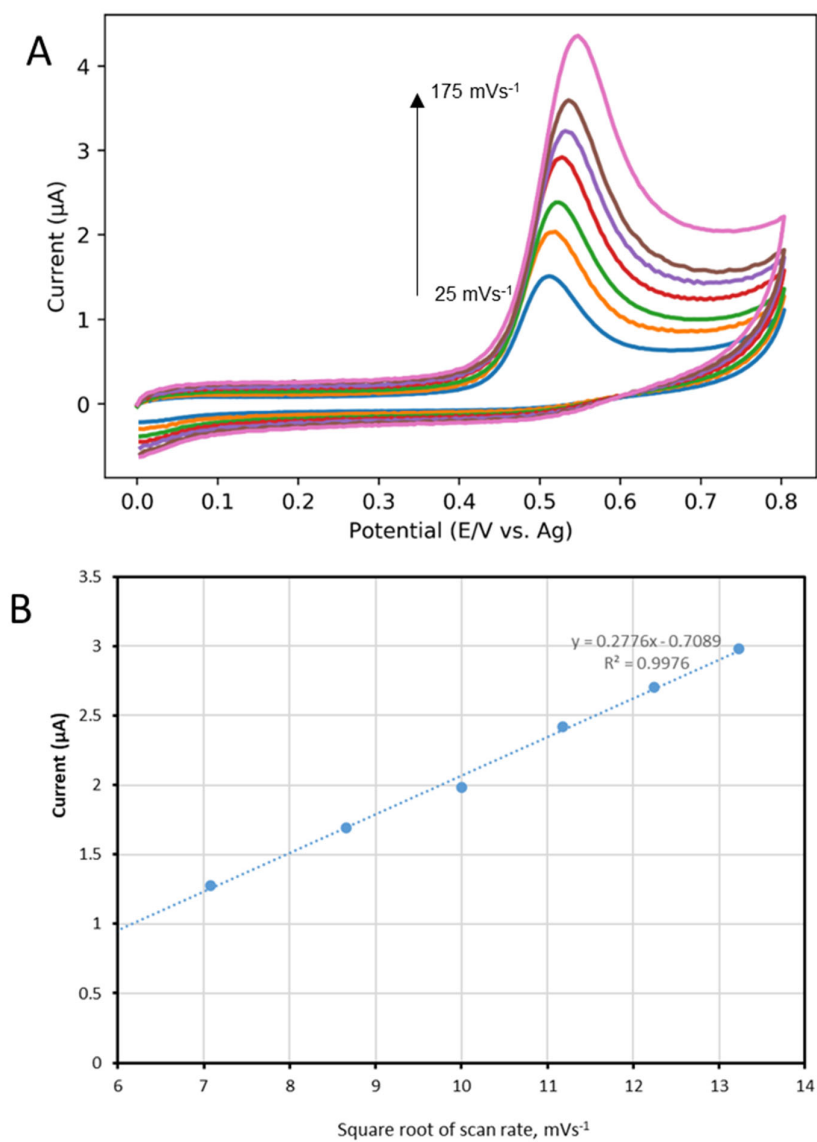

**Figure S4.** (A) Cyclic voltammetry electrochemical profile of estradiol of 3D-GFSPE in 20  $\mu\text{M}$  estradiol PBS pH 7.0 at scan rates (25 - 175  $\text{mV}\cdot\text{s}^{-1}$ ), (B) Plot of  $I_{pa}$  versus square root of scan rate ( $v^{1/2}$ ).

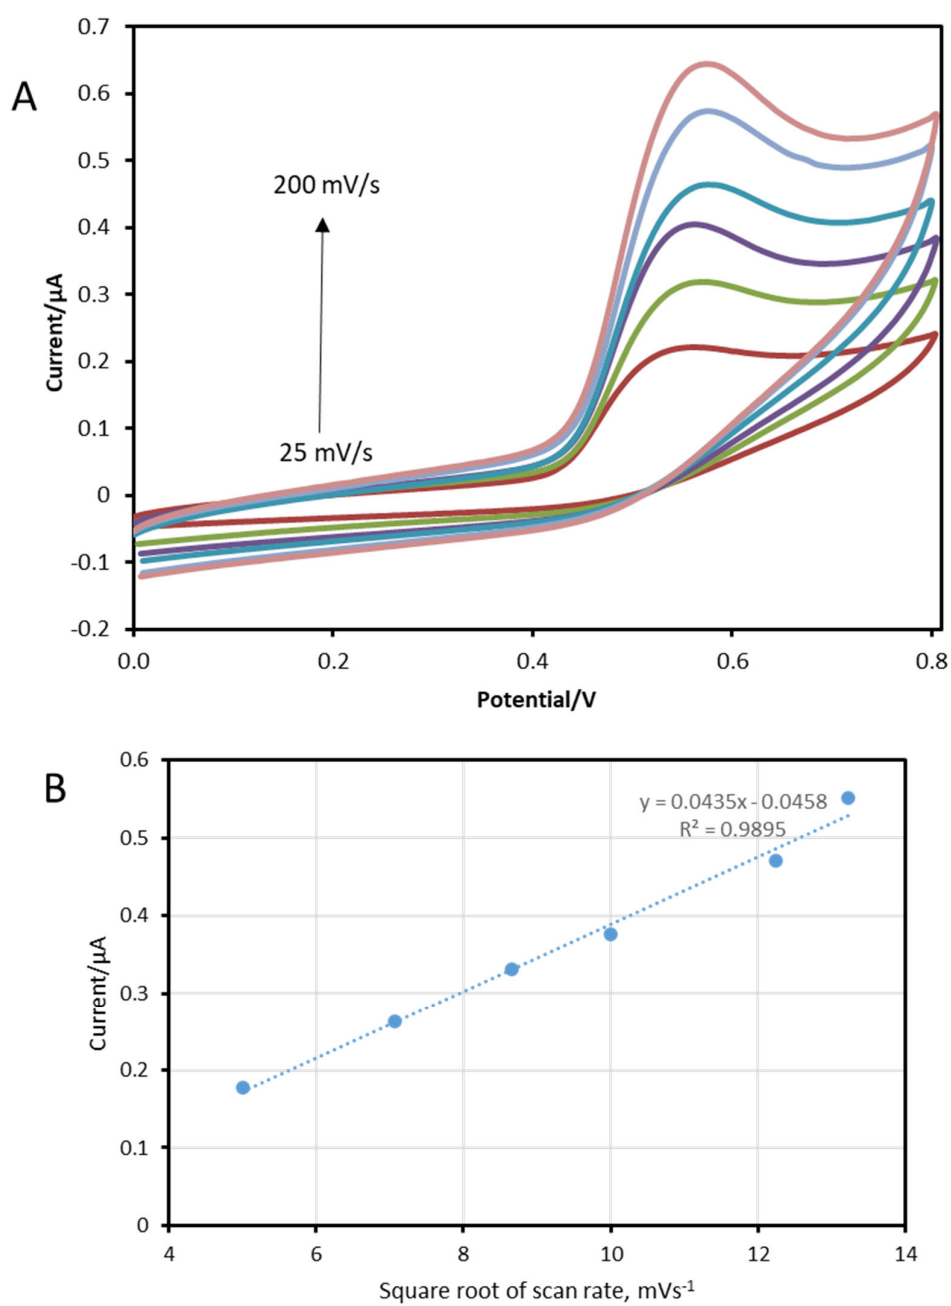

**Figure S5.** (A) Cyclic voltammetry electrochemical profile of estradiol of GHPSPE in 20  $\mu\text{M}$  estradiol PBS (pH 7) at scan rates (25 - 175  $\text{mV}\cdot\text{s}^{-1}$ ), (B) Plot of  $I_{pa}$  versus square root of scan rate ( $v^{1/2}$ ).

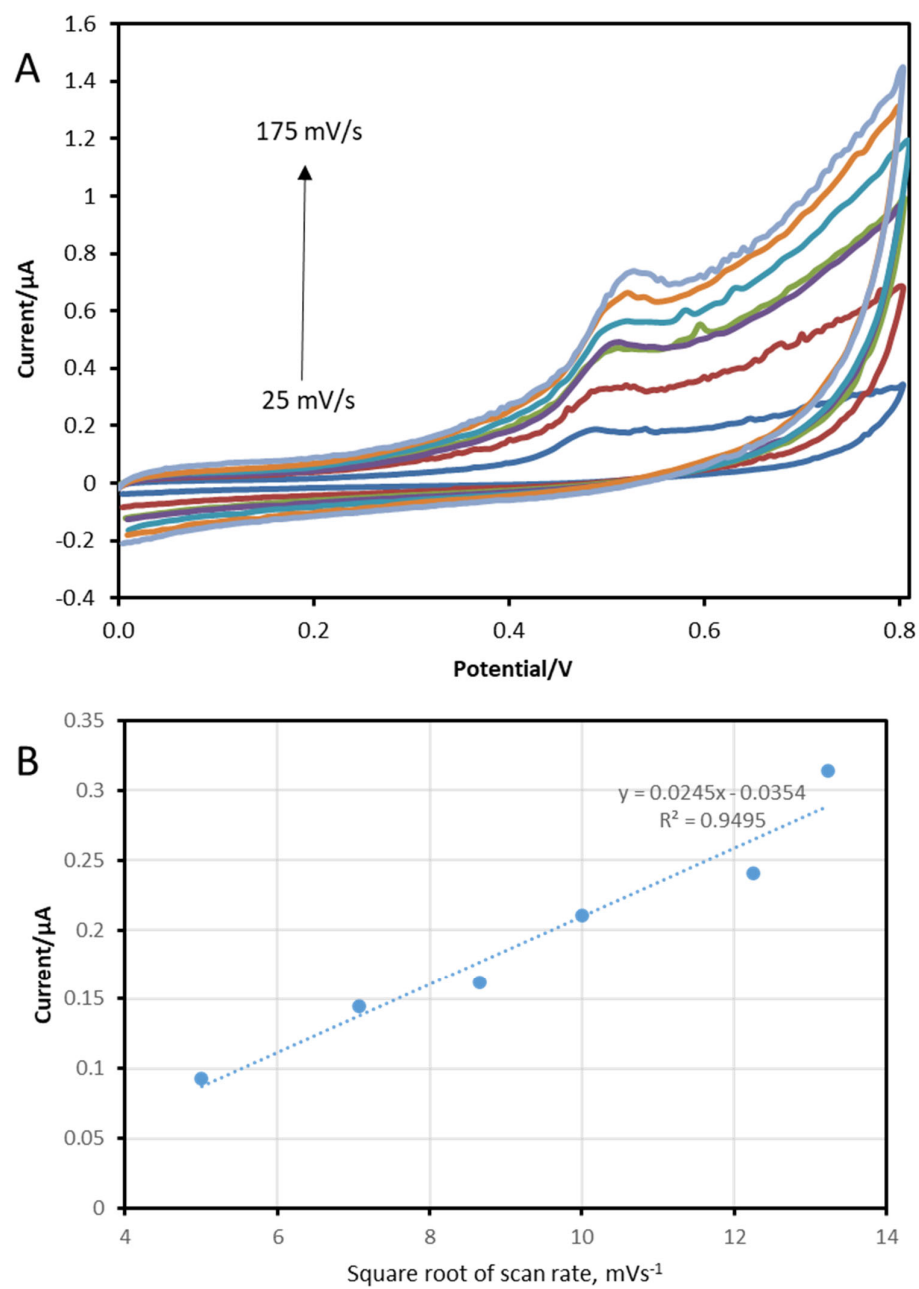

**Figure S6.** (A) Cyclic voltammetry electrochemical profile of estradiol of EEFGHSPE in 20  $\mu\text{M}$  estradiol PBS (pH 7) at scan rates (25 - 175  $\text{mV}\cdot\text{s}^{-1}$ ), (B) Plot of  $I_{pa}$  versus square root of scan rate ( $v^{1/2}$ ).

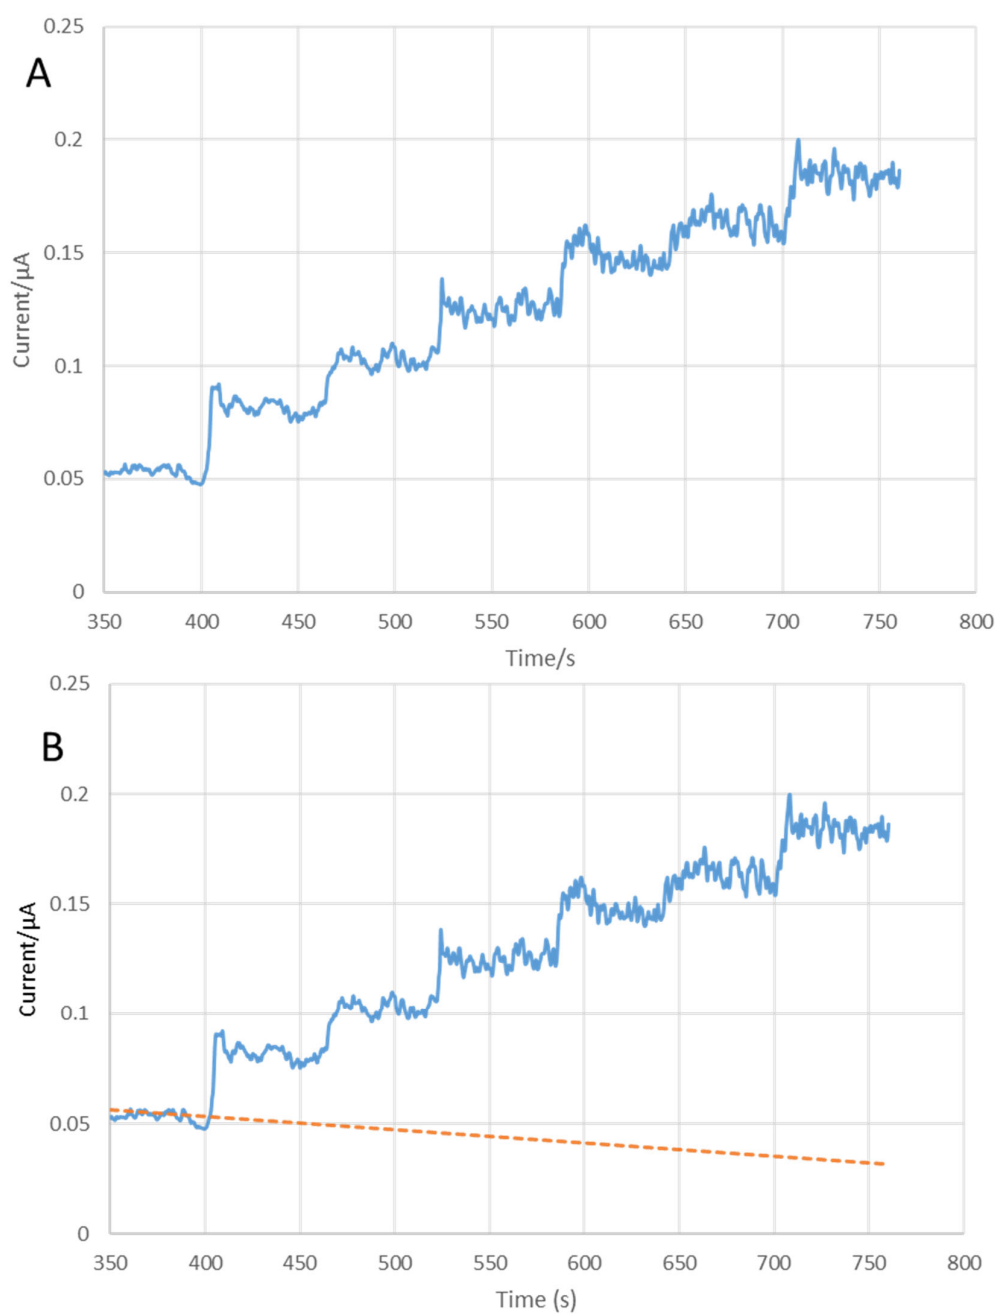

**Figure S7.** (A) Raw amperometric data for 3D-GFSPE Figure 5A (main text), without the application of smoothing or baseline correction. B: Example of baseline correction; the solid line represents the raw data and the dashed line the fitted baseline.

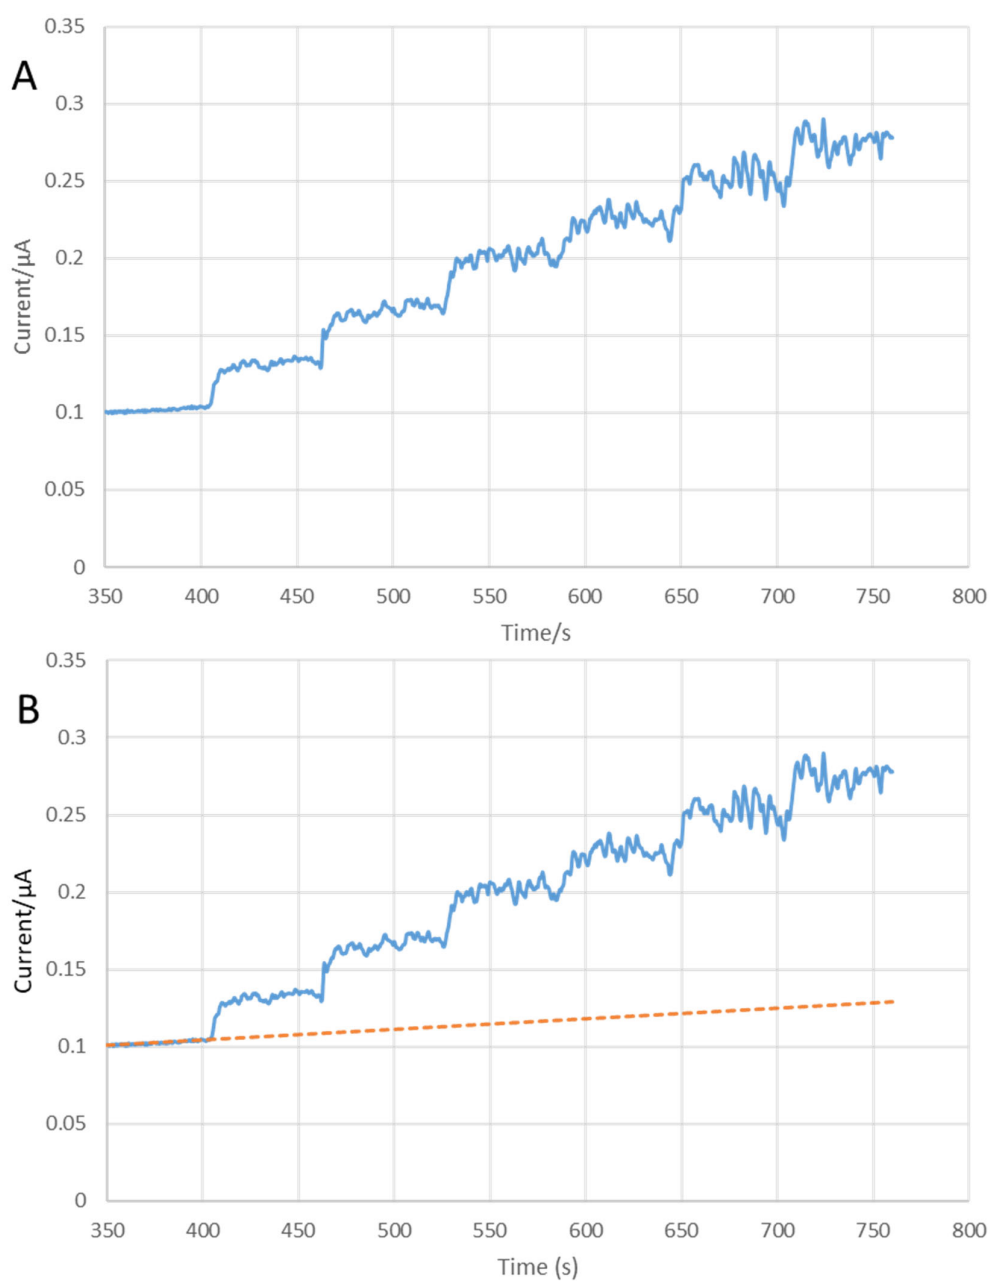

**Figure S8.** (A) Raw amperometric data for GHPSPE Figure 5B (main text), without the application of smoothing or baseline correction. B: Example of baseline correction; the solid line represents the raw data and the dashed line the fitted baseline.

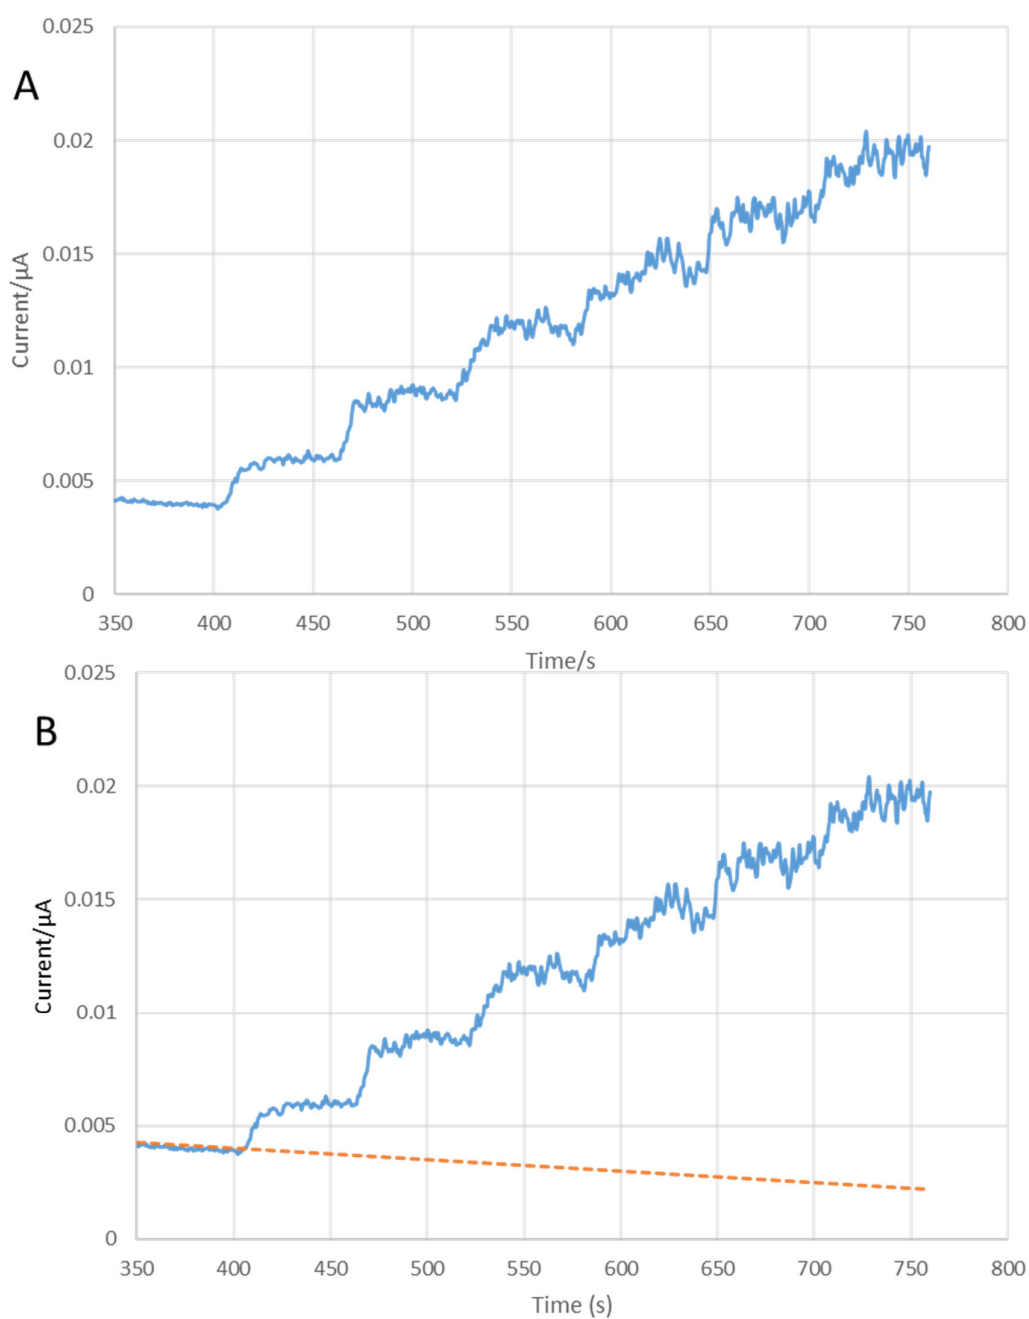

**Figure S9.** (A) Raw amperometric data for EEFGHSPE Figure 5C (main text), without the application of smoothing or baseline correction. B: Example of baseline correction; the solid line represents the raw data and the dashed line the fitted baseline.

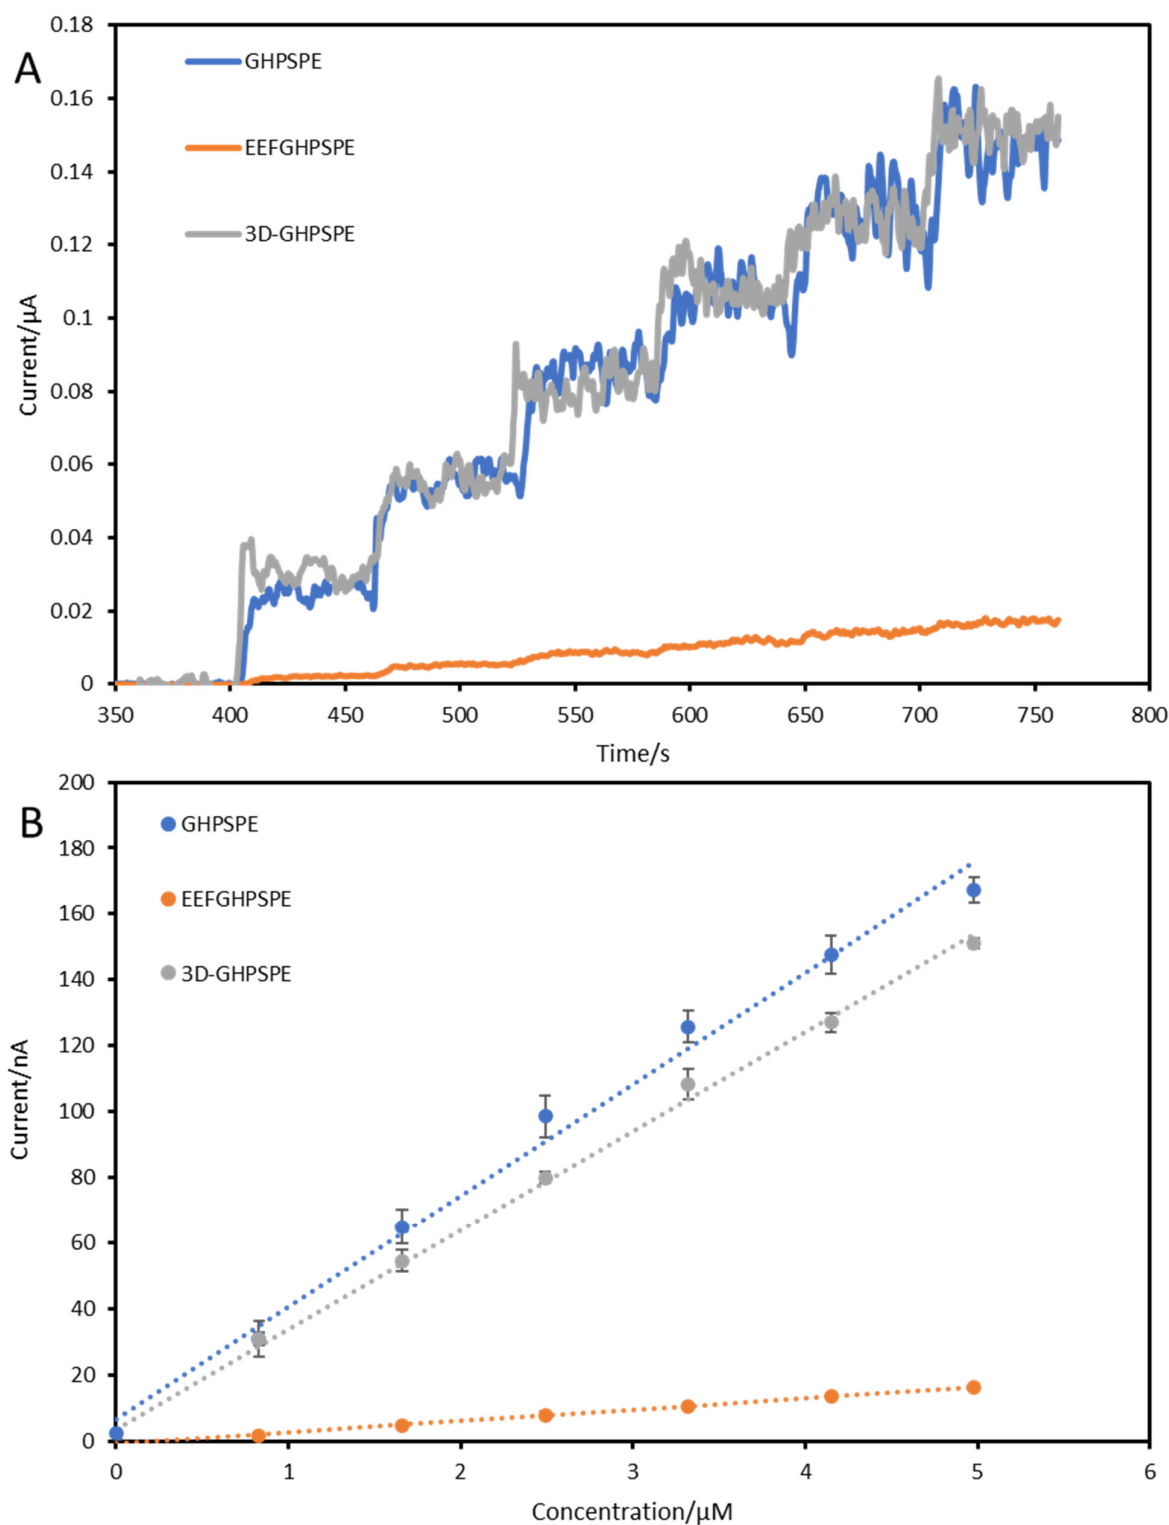

**Figure S10.** A) Plot of amperometric response obtained for three graphene-based electrodes: 3D-GHPSPE, GHPSPE, and EEFGHPSPE for estradiol with injection of ( $50\ \mu\text{L}$  at  $0.5\ \text{mM}$ ) are injected at 60s intervals. B) Mean of plateau current against E2 concentration. Error bars represent three standard deviations.

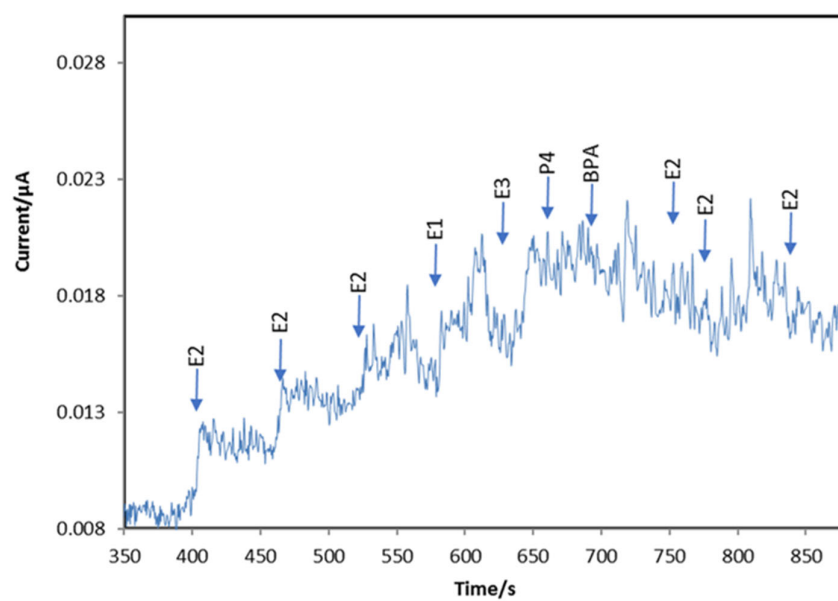

**Figure S11.** Amperometric response demonstrating the interference in sensing of estradiol. Estrone (E1), Estriol (E3), progesterone (P4) and Bisphenol A (BPA) of 0.5 mM each.
